# Supplementary material for: Nanobody Repertoires for Exposing Vulnerabilities of SARS-CoV-2
Source: PubMed Central journal article supplement — bioRxiv. 2021 Apr 10:2021.04.08.438911. Preprint. [Version 1] doi: 10.1101/2021.04.08.438911 (PMC8043454; doi:10.1101/2021.04.08.438911), 2021-04-10

Supplementary Figure 1

**a**

**S1**

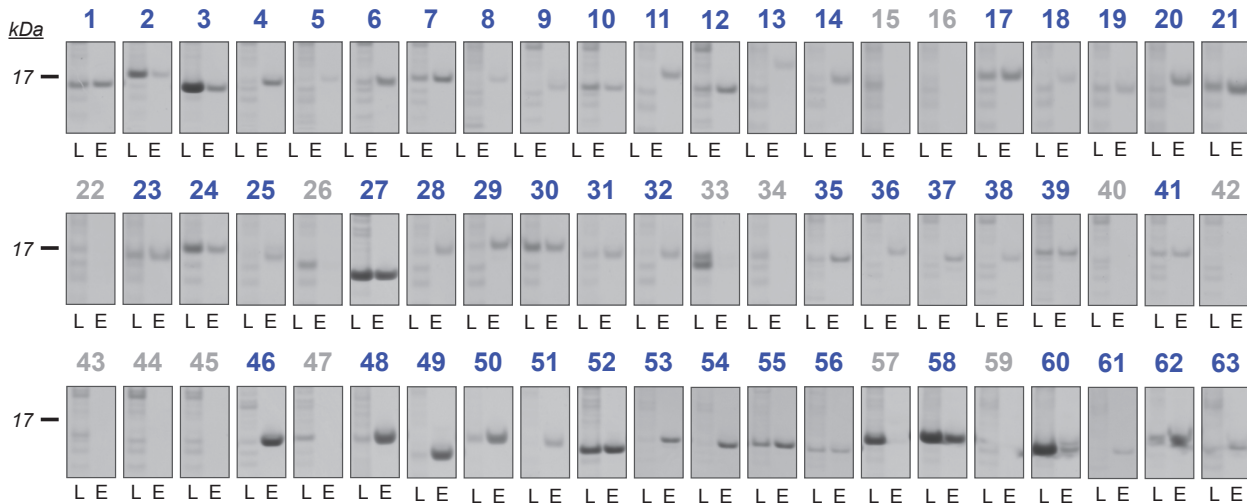

**b**

**S1-RBD**

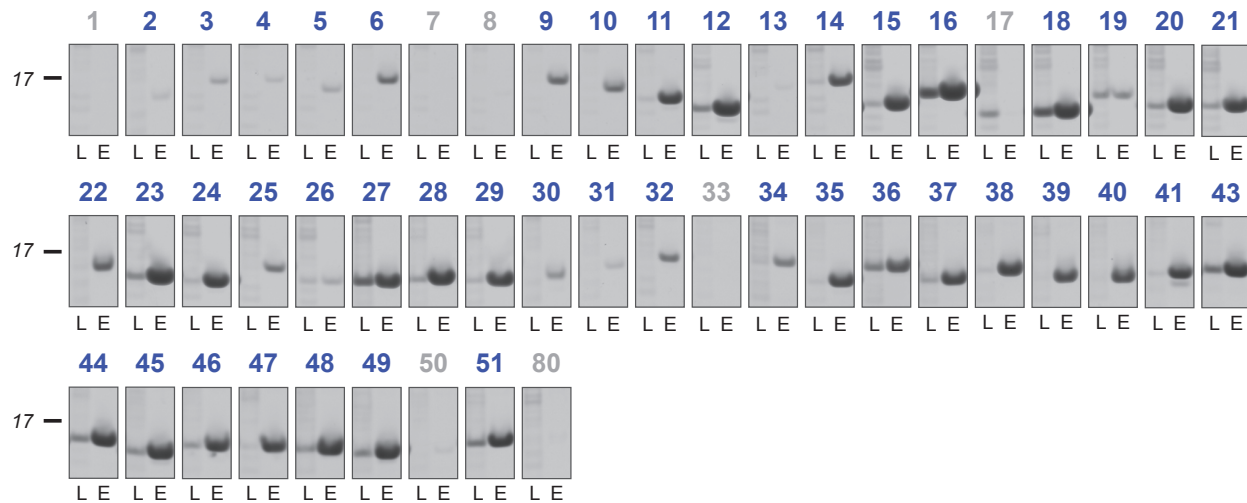

**c**

**S2**

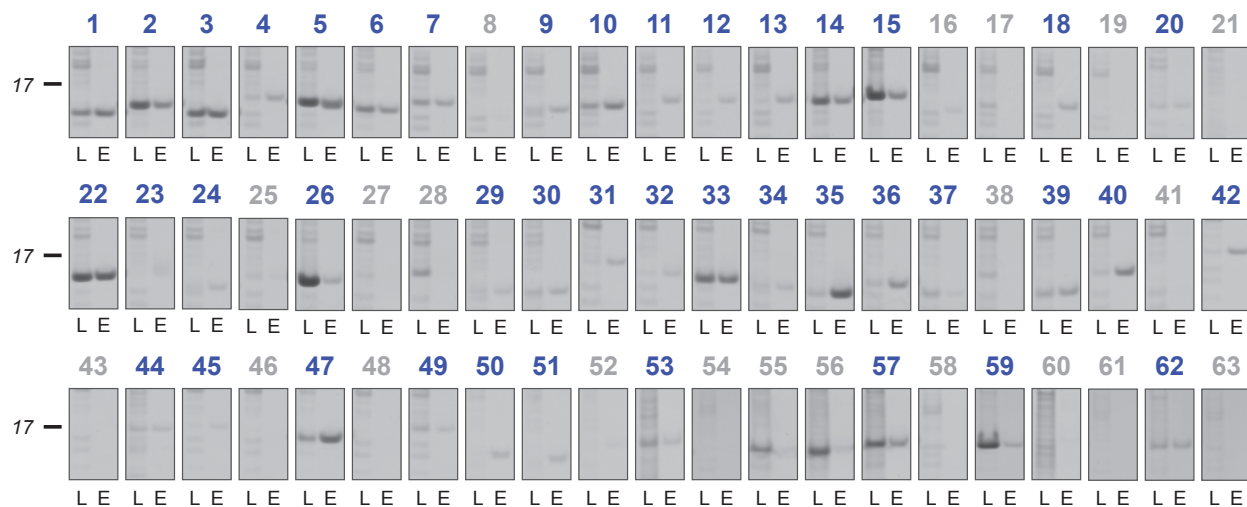

Supplement: media-1.pdf [file media-1.pdf]
