# Supplementary material for: Nanobody Repertoires for Exposing Vulnerabilities of SARS-CoV-2
Source: PubMed Central journal article supplement — bioRxiv. 2021 Apr 10:2021.04.08.438911. Preprint. [Version 1] doi: 10.1101/2021.04.08.438911 (PMC8043454; doi:10.1101/2021.04.08.438911), 2021-04-10
Supplement: media-3.pdf [file media-3.pdf]

| ID    | Epitope | S1                                                 |                                     |                                   | RBD                                                |                                     |                    | T <sub>m</sub> (°C) | SARS-CoV-2 PSV IC50 (s.e.m) (nM) |
|-------|---------|----------------------------------------------------|-------------------------------------|-----------------------------------|----------------------------------------------------|-------------------------------------|--------------------|---------------------|----------------------------------|
|       |         | K <sub>on</sub> (M <sup>-1</sup> s <sup>-1</sup> ) | K <sub>off</sub> (s <sup>-1</sup> ) | K <sub>D</sub> (M)                | K <sub>on</sub> (M <sup>-1</sup> s <sup>-1</sup> ) | K <sub>off</sub> (s <sup>-1</sup> ) | K <sub>D</sub> (M) |                     |                                  |
| S1-1  | RBD     | 4.14E+05                                           | 2.98E-05                            | 7.20E-11                          | 6.50E+05                                           | 5.98E-07                            | 9.20E-12           | 66.5                | 6.74 (1.03)                      |
| S1-2  | non-RBD | 1.59E+06                                           | 1.88E-03                            | 1.18E-09                          | No interaction detected                            |                                     |                    | 66.5                | NA                               |
| S1-3  | non-RBD | 5.08E+05                                           | 4.32E-04                            | 8.51E-10                          | No interaction detected                            |                                     |                    | 64                  | 1030 (666)                       |
| S1-4  | RBD     | 1.25E+06                                           | 1.06E-04                            | 8.46E-11                          | 1.26E+06                                           | 1.26E-04                            | 1.37E-10           | 66                  | 41.5 (3.68)                      |
| S1-5  | RBD     | 1.33E+05                                           | 1.15E-03                            | 8.61E-09                          | -                                                  |                                     |                    | 65.25               | NA                               |
| S1-6  | RBD     | 1.02E+06                                           | 5.75E-04                            | 5.65E-10                          | 5.92E+05                                           | 3.69E-04                            | 6.22E-10           | 65                  | 56.1 (20.7)                      |
| S1-7  | non-RBD | 7.59E+05                                           | 9.90E-04                            | 1.30E-09                          | No interaction detected                            |                                     |                    | 60.5                | NA                               |
| S1-9  | non-RBD | 9.51E+05<br>1.25E+05                               | 4.28E-07<br>1.57E-04                | 4.50E-13 <sup>a</sup><br>1.25E-09 | -                                                  |                                     |                    | 47.5                | NA                               |
| S1-10 | non-RBD | 8.35E+04                                           | 1.82E-03                            | 2.19E-08                          | -                                                  |                                     |                    | 64                  | NA                               |
| S1-11 | non-RBD | -                                                  |                                     |                                   | -                                                  |                                     |                    | 60                  | NA                               |
| S1-12 | RBD     | 2.90E+05                                           | 8.92E-04                            | 3.07E-09                          | 2.33E+05                                           | 2.24E-04                            | 9.63E-10           | 68                  | NA                               |
| S1-14 | RBD     | 1.08E+06                                           | 1.10E-03                            | 1.02E-09                          | 5.37E+05                                           | 7.99E-04                            | 1.49E-09           | 57.5                | 135.8 (36.4)                     |
| S1-17 | non-RBD | -                                                  |                                     |                                   | -                                                  |                                     |                    | 65                  | 1271 (888)                       |
| S1-19 | RBD     | 1.30E+06<br>3.55E+04                               | 8.86E-03<br>2.41E-04                | 6.81E-09 <sup>a</sup><br>6.81E-09 | -                                                  |                                     |                    | 64.5                | 139 (9.58)                       |
| S1-20 | RBD     | 1.48E+07                                           | 4.37E-03                            | 2.95E-10                          | -                                                  |                                     |                    | 69                  | 51.8 (3.72)                      |
| S1-21 | RBD     | 4.77E+06                                           | 1.58E-04                            | 3.31E-11                          | 1.22E+06                                           | 2.45E-04                            | 2.00E-10           | 70.5                | 68.1                             |
| S1-23 | RBD     | 2.82E+06                                           | 4.91E-05                            | 1.74E-11                          | 1.09E+06                                           | 1.07E-04                            | 9.78E-11           | 64                  | 5.7 (2.163)                      |
| S1-24 | non-RBD | 6.49E+05                                           | 2.89E-04                            | 4.45E-10                          | No interaction detected                            |                                     |                    | 71.5                | 868                              |
| S1-25 | non-RBD | 2.15E+05                                           | 3.39E-05                            | 1.57E-10                          | No interaction detected                            |                                     |                    | 58                  | NA                               |
| S1-27 | RBD     | 3.15E+06                                           | 4.52E-04                            | 1.43E-10                          | 2.89E+06                                           | 6.30E-04                            | 2.18E-10           | 54                  | 19.5 (4.90)                      |
| S1-28 | RBD     | 1.38E+06                                           | 7.97E-04                            | 5.76E-10                          | 1.79E+06                                           | 1.03E-03                            | 5.77E-10           | 66                  | 66.0 (10.9)                      |
| S1-29 | RBD     | 2.39E+05                                           | 1.01E-03                            | 4.21E-09                          | 1.73E+05                                           | 8.89E+04                            | 5.12E-09           | 61.5                | NA                               |
| S1-30 | non-RBD | 6.21E+05                                           | 1.48E-03                            | 2.38E-09                          | No interaction detected                            |                                     |                    | 57                  | 330                              |
| S1-31 | RBD     | 2.17E+06                                           | 5.63E-04                            | 2.59E-10                          | 1.94E+06                                           | 9.37E-04                            | 4.84E-10           | 72                  | 78.7 (3.48)                      |
| S1-32 | non-RBD | 2.73E+05                                           | 4.66E-04                            | 1.71E-09                          | No interaction detected                            |                                     |                    | 79                  | NA                               |
| S1-35 | RBD     | 2.46E+06                                           | 2.11E-05                            | 8.60E-12                          | 2.70E+06                                           | 9.77E-05                            | 3.62E-11           | 70.5                | 12.5 (0.101)                     |
| S1-36 | RBD     | 2.28E+06                                           | 3.92E-04                            | 1.72E-10                          | 7.87E+06                                           | 1.72E-03                            | 2.18E-10           | 63                  | 48.5 (21.1)                      |
| S1-37 | RBD     | 4.03E+06                                           | 2.75E-04                            | 6.82E-11                          | 4.14E+06                                           | 2.09E-04                            | 5.05E-11           | 65                  | 7.54                             |
| S1-38 | RBD     | 5.34E+06                                           | 1.12E-03                            | 2.10E-10                          | -                                                  |                                     |                    | 64                  | 63.2                             |
| S1-39 | RBD     | 2.14E+06                                           | 8.11E-04                            | 3.79E-10                          | 1.68E+06                                           | 1.06E-03                            | 6.30E-10           | 55                  | 111 (4.03)                       |
| S1-41 | non-RBD | 8.73E+05                                           | 1.38E-03                            | 1.58E-09                          | No interaction detected                            |                                     |                    | 62.5                | 732                              |
| S1-46 | RBD     | 1.68E+05                                           | 2.94E-04                            | 1.75E-09                          | 2.22E+05                                           | 1.70E-04                            | 7.66E-10           | 68                  | 312 (14.0)                       |
| S1-48 | RBD     | 2.61E+06                                           | 6.22E-05                            | 2.39E-11                          | 1.66E+06                                           | 1.64E-04                            | 9.85E-11           | 60.5                | 5.82 (0.832)                     |
| S1-49 | non-RBD | 1.94E+06                                           | 3.63E-03                            | 1.87E-09                          | -                                                  |                                     |                    | 49, 74 <sup>c</sup> | 356 (56.9)                       |
| S1-50 | non-RBD | 3.33E+05<br>3.34E-03                               | 1.39E-02<br>3.94E-04                | 4.40E-09 <sup>b</sup>             | No interaction detected                            |                                     |                    | 66                  | 24,303                           |
| S1-51 | RBD     | 9.28E+04                                           | 4.22E-04                            | 4.54E-09                          | 3.77E+06                                           | 2.01E-03                            | 5.33E-10           | 56                  | 608                              |
| S1-52 | RBD     | 4.22E+05                                           | 3.13E-04                            | 7.74E-09                          | 4.53E+04                                           | 1.94E-04                            | 4.36E-09           | 57.5                | 3,634                            |
| S1-53 | RBD     | 1.40E+06<br>2.36E+04                               | 8.46E-03<br>2.19E-04                | 6.05E-09<br>9.27E-09              | -                                                  |                                     |                    | 51.5                | 3,406                            |
| S1-54 | RBD     | 1.13E+06                                           | 6.58E-05                            | 5.84E-11                          | 2.55E+04                                           | 2.88E-04                            | 1.13E-08           | 69                  | 148                              |

|           |         |                      |                      |                                   |                      |                      |                      |                         |              |
|-----------|---------|----------------------|----------------------|-----------------------------------|----------------------|----------------------|----------------------|-------------------------|--------------|
| S1-55     | RBD     | 3.98E+06<br>3.53E+04 | 5.41E-03<br>5.31E-06 | 1.36E-09<br>1.51E-10              | 5.03E+05<br>1.84E+04 | 1.11E-02<br>1.82E-04 | 2.21E-08<br>9.89E-09 | 54.5                    | 2,353        |
| S1-56     | RBD     | 1.46E+04<br>4.45E-03 | 2.99E-03<br>7.90E-05 | 3.57E-09 <sup>b</sup>             | 2.21E+03             | 1.05E-04             | 4.73E-08             | 54                      | NA           |
| S1-58     | non-RBD | 5.73E+05             | 1.66E-04             | 2.90E-10                          | -                    |                      |                      | 53.5                    | 146          |
| S1-60     | non-RBD | 3.30E+05<br>4.61E+04 | 5.24E-06<br>3.67E-03 | 1.59E-11 <sup>a</sup><br>9.58E-08 | -                    |                      |                      | 62                      | NA           |
| S1-61     | RBD     | 9.87E+05<br>8.23E+02 | 1.81E-02<br>1.10E-04 | 1.84E-08 <sup>a</sup><br>1.34E-07 | 4.46E+04             | 1.88E-04             | 4.21E-09             | 60                      | NA           |
| S1-62     | RBD     | 2.68E+06             | 9.51E-05             | 3.54E-11                          | 3.30E+06             | 6.30E-05             | 2.08E-11             | 71.5                    | 4.95         |
| S1-63     | RBD     | 1.09E+06<br>3.39E+04 | 1.12E-02<br>1.67E-04 | 1.02E-08 <sup>a</sup><br>4.94E-09 | 5.10E+04             | 2.23E-04             | 4.37E-09             | 65                      | NA           |
| S1-RBD-3  | RBD     | 8.81E-05<br>7.36E+04 | 1.76E-02<br>1.13E-03 | 2.00E-08 <sup>a</sup><br>1.53E-08 | -                    |                      |                      | 72                      | 384 (18.7)   |
| S1-RBD-4  | RBD     | 2.02E+06             | 1.64E-04             | 8.09E-11                          | 2.83E+06             | 8.16E-04             | 2.89E-10             | 64.5                    | 17.5 (1.98)  |
| S1-RBD-5  | RBD     | 1.94E+06             | 1.63E-04             | 8.38E-11                          | 7.21E+06             | 1.05E-03             | 1.45E-10             | 64                      | 34.5         |
| S1-RBD-6  | RBD     | 1.55E+06             | 1.63E-04             | 1.05E-10                          | 3.48E+06             | 1.13E-03             | 3.24E-10             | 66.5                    | 77.2 (21.8)  |
| S1-RBD-9  | RBD     | -                    |                      |                                   | 2.85E+05             | 1.23E-04             | 4.30E-10             | 69                      | 522          |
| S1-RBD-10 | RBD     | -                    |                      |                                   | -                    |                      |                      | -                       | 52.9         |
| S1-RBD-11 | RBD     | 2.22E+07             | 2.94E-04             | 1.32E-11                          | 2.06E+07             | 4.06E-04             | 1.97E-11             | 65                      | 13.5 (5.50)  |
| S1-RBD-12 | RBD     | -                    |                      |                                   | 1.10E+04             | 3.39E-05             | 3.10E-09             | 67                      | NA           |
| S1-RBD-14 | RBD     | -                    |                      |                                   | 1.33E+04             | 3.34E-04             | 2.51E-08             | 65                      | NA           |
| S1-RBD-15 | RBD     | 5.37E+06             | 1.50E-04             | 2.79E-11                          | 7.52E+06             | 4.95E-04             | 6.58E-11             | 59.5, 80 <sup>c</sup>   | 5.29 (1.44)  |
| S1-RBD-16 | RBD     | -                    |                      |                                   | 1.68E+04             | 6.25E-05             | 3.73E-09             | 61                      | 79.2 (4.23)  |
| S1-RBD-18 | RBD     | 2.28E+06             | 6.25E-04             | 2.74E-10                          | 4.43E+06             | 1.27E-03             | 2.87E-10             | 69.5                    | 67.2 (1.92)  |
| S1-RBD-19 | RBD     | -                    |                      |                                   | -                    |                      |                      | 60                      | 3,902        |
| S1-RBD-20 | RBD     | 2.37E+06             | 2.23E-04             | 9.43E-11                          | 3.05E+06             | 7.91E-04             | 2.59E-10             | 49, 70 <sup>c</sup>     | 12.4 (1.06)  |
| S1-RBD-21 | RBD     | 3.50E+06             | 1.31E-03             | 3.73E-10                          | 3.15E+06             | 1.71E-03             | 5.45E-10             | 48.5, 70.5 <sup>c</sup> | 14.1         |
| S1-RBD-22 | RBD     | 9.34E+05             | 2.28E-04             | 2.44E-10                          | 9.24E+05             | 4.42E-04             | 4.78E-10             | 57.5                    | 100 (0.078)  |
| S1-RBD-23 | RBD     | -                    |                      |                                   | 2.89E+06             | 4.61E-05             | 1.59E-11             | 61                      | 7.31 (0.418) |
| S1-RBD-24 | RBD     | 1.61E+06             | 1.40E-03             | 8.65E-10                          | 2.12E+06             | 1.22E-03             | 5.75E-10             | 46, 67 <sup>c</sup>     | 218          |
| S1-RBD-25 | RBD     | -                    |                      |                                   | 8.41E+04             | 1.16E-02             | 1.38E-07             | -                       | NA           |
| S1-RBD-26 | RBD     | 1.06E+05             | 4.58E-06             | 4.32E-11                          | 2.15E+05             | 1.33E-05             | 6.19E-11             | 66                      | 241 (81.4)   |
| S1-RBD-27 | RBD     | -                    |                      |                                   | 6.19E+06             | 1.24E-02             | 2.00E-09             | 71                      | 65.8         |
| S1-RBD-28 | RBD     | 1.80E+06             | 4.27E-04             | 2.38E-10                          | 1.80E+06             | 4.27E-04             | 2.38E-10             | 64.5                    | 32.7 (3.07)  |
| S1-RBD-29 | RBD     | -                    |                      |                                   | 5.36E+05             | 1.35E-03             | 2.51E-09             | 74                      | 9.53 (1.04)  |
| S1-RBD-30 | RBD     | 2.15E+06             | 6.66E-05             | 3.10E-11                          | 3.77E+06             | 4.82E-04             | 1.28E-10             | 65                      | 25.0 (3.57)  |
| S1-RBD-32 | RBD     | -                    |                      |                                   | 1.05E+05             | 7.90E-03             | 7.52E-08             | 65                      | NA           |
| S1-RBD-34 | RBD     | -                    |                      |                                   | 5.71E+04             | 4.88E-03             | 8.54E-08             | 64                      | NA           |
| S1-RBD-35 | RBD     | 8.01E+05             | 1.68E-04             | 2.10E-10                          | 1.33E+06             | 2.50E-04             | 1.88E-10             | 57, 68 <sup>c</sup>     | 12.3 (2.40)  |
| S1-RBD-36 | RBD     | -                    |                      |                                   | -                    |                      |                      | 71                      | NA           |
| S1-RBD-37 | RBD     | -                    |                      |                                   | 3.60E+05             | 8.88E-04             | 2.47E-09             | 71                      | 391          |
| S1-RBD-38 | RBD     | -                    |                      |                                   | 1.12E+06             | 9.84E-04             | 8.79E-10             | 68.5                    | 84.6 (22.7)  |
| S1-RBD-39 | RBD     | -                    |                      |                                   | 4.92E+05             | 7.77E-05             | 1.58E-10             | 67.5                    | 77.8         |
| S1-RBD-40 | RBD     | -                    |                      |                                   | 7.47E+05             | 2.77E-05             | 3.71E-11             | 70                      | 25.6 (5.88)  |
| S1-RBD-41 | RBD     | -                    |                      |                                   | 4.37E+05             | 1.39E-04             | 3.17E-10             | -                       | 17.0         |
| S1-RBD-43 | RBD     | -                    |                      |                                   | 6.21E+05             | 1.82E-04             | 2.92E-10             | 68                      | 33.6 (1.33)  |
| S1-RBD-44 | RBD     | -                    |                      |                                   | 1.91E+05             | 6.97E-05             | 3.65E-10             | 57.5                    | 93.4         |
| S1-RBD-45 | RBD     | -                    |                      |                                   | 4.43E+05             | 4.14E-05             | 9.30E-11             | 53                      | 22.6         |

|           |     |          |          |          |          |          |          |                     |             |
|-----------|-----|----------|----------|----------|----------|----------|----------|---------------------|-------------|
| S1-RBD-46 | RBD | -        |          |          | 4.69E+05 | 5.79E-04 | 1.23E-09 | 75.5                | 48.0        |
| S1-RBD-47 | RBD | -        |          |          | 2.11E+05 | 6.45E-04 | 3.06E-09 | 53.5                | 127 (11.6)  |
| S1-RBD-48 | RBD | -        |          |          | 1.05E+05 | 2.42E-04 | 2.30E-09 | 58, 63 <sup>c</sup> | 54.5        |
| S1-RBD-49 | RBD | 3.24E+05 | 3.24E-04 | 1.00E-09 | 3.15E+05 | 5.34E-04 | 1.69E-09 | 66.5                | 37.6        |
| S1-RBD-51 | RBD | -        |          |          | 3.77E+06 | 2.01E-03 | 5.33E-10 | 52, 61 <sup>c</sup> | 70.9 (29.3) |

<sup>a</sup>Curves were fit to a heterogeneous ligand model. Respective  $K_{on}$ ,  $K_{off}$ , and  $K_D$  values are shown for each component.

<sup>b</sup>Curves were fit to a two-state reaction model. Respective  $K_{on}$ ,  $K_{off}$ , and  $K_D$  values are shown for each binding state.

<sup>c</sup>Two peaks were observed in the melting curve.  $T_m$ s for both are reported.

"-" - Not determined

NA - No activity
