# Supplementary material for: Nanobody Repertoires for Exposing Vulnerabilities of SARS-CoV-2
Source: PubMed Central journal article supplement — bioRxiv. 2021 Apr 10:2021.04.08.438911. Preprint. [Version 1] doi: 10.1101/2021.04.08.438911 (PMC8043454; doi:10.1101/2021.04.08.438911), 2021-04-10
Supplement: media-4.pdf [file media-4.pdf]

| ID    | $K_{on}$<br>( $M^{-1}s^{-1}$ ) | $K_{off}$<br>( $s^{-1}$ ) | $K_D$ (M) | $T_m$ ( $^{\circ}C$ ) | SARS-CoV-2<br>PSV IC50<br>(s.e.m) (nM) |
|-------|--------------------------------|---------------------------|-----------|-----------------------|----------------------------------------|
| S2-1  | 6.32E+04                       | 3.79E-04                  | 6.00E-09  | 65.5                  | NA                                     |
| S2-2  | 1.26E+06                       | 9.35E-05                  | 7.41E-11  | 64.5                  | 4,460 (902)                            |
| S2-3  | 2.62E+05                       | 7.21E-05                  | 2.76E-10  | 65                    | 2,234 (751)                            |
| S2-4  | 2.44E+06                       | 2.62E-04                  | 1.08E-10  | 56                    | NA                                     |
| S2-5  | 9.35E+05                       | 2.74E-04                  | 2.93E-10  | 66                    | NA                                     |
| S2-6  | -                              |                           |           | 61.5                  | NA                                     |
| S2-7  | 1.66E+06                       | 9.36E-05                  | 5.62E-11  | 61                    | NA                                     |
| S2-9  | 9.29E+05                       | 2.32E-04                  | 2.50E-10  | 64.5                  | NA                                     |
| S2-10 | 9.31E+04                       | 3.13E-04                  | 3.37E-09  | 59, 64.5 <sup>a</sup> | 1,718                                  |
| S2-11 | 7.94E+06                       | 1.12E-03                  | 1.41E-10  | 69.5                  | NA                                     |
| S2-13 | 7.02E+05                       | 1.05E-04                  | 1.49E-10  | 64.5                  | NA                                     |
| S2-14 | 3.16E+06                       | 1.28E-03                  | 4.07E-10  | 72.5                  | NA                                     |
| S2-15 | -                              |                           |           | 70                    | NA                                     |
| S2-18 | 1.63E+06                       | 4.87E-04                  | 2.99E-10  | 47, 54.5 <sup>a</sup> | NA                                     |
| S2-22 | -                              |                           |           | -                     | NA                                     |
| S2-26 | 4.45E+05                       | 8.15E-05                  | 1.83E-10  | 76.5                  | NA                                     |
| S2-33 | 3.68E+05                       | 5.58E-05                  | 2.33E-10  | 70                    | NA                                     |
| S2-35 | 2.36E+05                       | 4.72E-05                  | 2.00E-10  | 77                    | NA                                     |
| S2-36 | 4.39E+06                       | 3.69E-04                  | 8.41E-11  | 74                    | NA                                     |
| S2-39 | -                              |                           |           | 58                    | NA                                     |
| S2-40 | 5.08E+04                       | 7.16E-05                  | 1.41E-09  | 69.5                  | 1,712 (828)                            |
| S2-42 | 5.12E+05                       | 3.77E-06                  | 7.36E-12  | 69                    | NA                                     |
| S2-47 | 3.86E+05                       | 1.14E-04                  | 2.96E-10  | 40, 65 <sup>a</sup>   | NA                                     |
| S2-57 | 2.33E+06                       | 7.18E-04                  | 3.08E-10  | 67                    | NA                                     |
| S2-59 | -                              |                           |           | 37.5, 60 <sup>a</sup> | NA                                     |
| S2-62 | 1.65E+06                       | 1.12E-04                  | 6.81E-11  | 64, 77.5 <sup>a</sup> | 12,979                                 |

<sup>a</sup>Two peaks were observed in the melting curve.  $T_m$ s for both are reported.

"-" - Not determined

NA - No activity
