# Supplementary material for: Nanobody Repertoires for Exposing Vulnerabilities of SARS-CoV-2
Source: PubMed Central journal article supplement — bioRxiv. 2021 Apr 10:2021.04.08.438911. Preprint. [Version 1] doi: 10.1101/2021.04.08.438911 (PMC8043454; doi:10.1101/2021.04.08.438911), 2021-04-10
Supplement: media-5.pdf [file media-5.pdf]

| ID                          | Epitope    | SARS-CoV-2<br>PSV IC50<br>(s.e.m)<br>(nM) |
|-----------------------------|------------|-------------------------------------------|
| S1-1                        | RBD        | 6.74 (1.03)                               |
| S1-1 <sub>dimer</sub>       | RBD        | 5.09                                      |
| S1-1 <sub>trimer</sub>      | RBD        | 5.87                                      |
| S1-23                       | RBD        | 5.69 (2.16)                               |
| S1-23 <sub>dimer</sub>      | RBD        | 0.22 (0.054)                              |
| S1-23 <sub>trimer</sub>     | RBD        | 0.089 (0.019)                             |
| S1-RBD-35                   | RBD        | 12.3 (2.40)                               |
| S1-RBD-35 <sub>dimer</sub>  | RBD        | 0.15 (0.11)                               |
| S1-RBD-35 <sub>trimer</sub> | RBD        | 0.068 (0.043)                             |
| S1-3                        | S1 non-RBD | 1030 (666)                                |
| S1-3 <sub>dimer</sub>       | S1 non-RBD | 429                                       |
| S1-30                       | S1 non-RBD | 330                                       |
| S1-30 <sub>dimer</sub>      | S1 non-RBD | 18.3                                      |
| S1-7                        | S1 non-RBD | NA                                        |
| S1-7 <sub>dimer</sub>       | S1 non-RBD | NA                                        |
| S1-7 <sub>trimer</sub>      | S1 non-RBD | NA                                        |
| S1-17                       | S1 non-RBD | 1271 (888)                                |
| S1-17 <sub>dimer</sub>      | S1 non-RBD | 2,144                                     |
| S1-49                       | S1 non-RBD | 356 (56.9)                                |
| S1-49 <sub>dimer</sub>      | S1 non-RBD | 9.06 (1.20)                               |
| S1-49 <sub>trimer</sub>     | S1 non-RBD | 0.87 (0.075)                              |
| S2-7                        | S2         | NA                                        |
| S2-7 <sub>dimer</sub>       | S2         | 246                                       |
| S2-10                       | S2         | 1718                                      |
| S2-10 <sub>dimer</sub>      | S2         | 20.4                                      |

NA - No activity
