# Supplementary material for: Nanobody Repertoires for Exposing Vulnerabilities of SARS-CoV-2
Source: PubMed Central journal article supplement — bioRxiv. 2021 Apr 10:2021.04.08.438911. Preprint. [Version 1] doi: 10.1101/2021.04.08.438911 (PMC8043454; doi:10.1101/2021.04.08.438911), 2021-04-10
Supplement: media-6.pdf [file media-6.pdf]

| ID        | Spike S1 variant | $K_{on}$<br>( $M^{-1}s^{-1}$ ) | $K_{off}$<br>( $s^{-1}$ ) | $K_D$ (M) |
|-----------|------------------|--------------------------------|---------------------------|-----------|
| S1-1      | WT (Wuhan 2019)  | 4.14E+05                       | 2.98E-05                  | 7.20E-11  |
|           | 20I/501Y.V1      | 2.71E+05                       | 1.21E-05                  | 4.44E-11  |
|           | 20H/501Y.V2      | 2.78E+05                       | 1.25E-05                  | 4.51E-11  |
| S1-6      | WT (Wuhan 2019)  | 1.02E+06                       | 5.75E-04                  | 5.65E-10  |
|           | 20I/501Y.V1      | 3.55E+06                       | 6.27E-04                  | 1.77E-10  |
|           | 20H/501Y.V2      | 1.03E+06                       | 3.29E-04                  | 3.20E-10  |
| S1-23     | WT (Wuhan 2019)  | 2.82E+06                       | 4.91E-05                  | 1.74E-11  |
|           | 20I/501Y.V1      | 5.96E+06                       | 1.36E-03                  | 2.29E-10  |
|           | 20H/501Y.V2      | NA                             | NA                        | NA        |
| S1-RBD-9  | WT (Wuhan 2019)  | 2.85E+05                       | 1.23E-04                  | 4.30E-10  |
|           | 20I/501Y.V1      | 4.84E+04                       | 3.88E-05                  | 8.01E-10  |
|           | 20H/501Y.V2      | 1.34E+05                       | 9.55E-05                  | 7.13E-10  |
| S1-RBD-11 | WT (Wuhan 2019)  | 2.22E+07                       | 2.94E-04                  | 1.32E-11  |
|           | 20I/501Y.V1      | 3.84E+06                       | 2.87E-04                  | 7.46E-11  |
|           | 20H/501Y.V2      | 6.85E+06                       | 1.10E-03                  | 1.61E-10  |
| S1-RBD-15 | WT (Wuhan 2019)  | 5.37E+06                       | 1.50E-04                  | 2.79E-11  |
|           | 20I/501Y.V1      | 2.99E+06                       | 1.26E-04                  | 4.22E-11  |
|           | 20H/501Y.V2      | 4.02E+06                       | 2.22E-04                  | 5.53E-11  |
| S1-RBD-35 | WT (Wuhan 2019)  | 8.01E+05                       | 1.68E-04                  | 2.10E-10  |
|           | 20I/501Y.V1      | 1.33E+07                       | 2.40E-03                  | 1.80E-10  |
|           | 20H/501Y.V2      | 5.94E+06                       | 2.65E-03                  | 4.46E-10  |

NA - No activity
