# Supplementary material for: Nanobody Repertoires for Exposing Vulnerabilities of SARS-CoV-2
Source: PubMed Central journal article supplement — bioRxiv. 2021 Apr 10:2021.04.08.438911. Preprint. [Version 1] doi: 10.1101/2021.04.08.438911 (PMC8043454; doi:10.1101/2021.04.08.438911), 2021-04-10
Supplement: media-7.pdf [file media-7.pdf]

| ID        | Epitope | SARS-CoV-2<br>PSV IC50<br>(s.e.m)<br>(nM) | SARS-CoV-1<br>PSV IC50<br>(s.e.m) (nM) | SARS-CoV-2<br>20H/501Y.V2<br>PSV IC50<br>(s.e.m.) (nM) |
|-----------|---------|-------------------------------------------|----------------------------------------|--------------------------------------------------------|
| S1-1      | RBD     | 6.74 (1.03)                               | 8.62 (6.38)                            | 5.83 (1.40)                                            |
| S1-3      | non-RBD | 1030 (666)                                | 3,598 (563)                            | –                                                      |
| S1-4      | RBD     | 41.5 (3.68)                               | 179                                    | –                                                      |
| S1-6      | RBD     | 56.1 (20.7)                               | 227 (205)                              | –                                                      |
| S1-17     | non-RBD | 1271 (888)                                | NA                                     | –                                                      |
| S1-20     | RBD     | 51.8 (3.72)                               | NA                                     | NA                                                     |
| S1-23     | RBD     | 5.69 (2.16)                               | NA                                     | NA                                                     |
| S1-24     | non-RBD | 868                                       | NA                                     | –                                                      |
| S1-27     | RBD     | 19.5 (4.90)                               | NA                                     | –                                                      |
| S1-30     | non-RBD | 330                                       | NA                                     | –                                                      |
| S1-31     | RBD     | 78.7 (3.48)                               | NA                                     | –                                                      |
| S1-35     | RBD     | 12.5 (0.101)                              | 386.8 (350)                            | –                                                      |
| S1-36     | RBD     | 48.5 (21.1)                               | NA                                     | –                                                      |
| S1-37     | RBD     | 7.54                                      | NA                                     | NA                                                     |
| S1-39     | RBD     | 111 (4.03)                                | 3.60                                   | –                                                      |
| S1-41     | non-RBD | 732                                       | NA                                     | –                                                      |
| S1-48     | RBD     | 5.82 (0.832)                              | NA                                     | –                                                      |
| S1-49     | non-RBD | 356 (56.9)                                | NA                                     | –                                                      |
| S1-51     | RBD     | 608                                       | NA                                     | –                                                      |
| S1-58     | non-RBD | 146                                       | NA                                     | –                                                      |
| S1-62     | RBD     | 4.95                                      | –                                      | NA                                                     |
| S1-RBD-6  | RBD     | 77.2 (21.8)                               | 89.7                                   | –                                                      |
| S1-RBD-9  | RBD     | 522                                       | –                                      | 116                                                    |
| S1-RBD-11 | RBD     | 13.5 (5.50)                               | NA                                     | 42.9                                                   |
| S1-RBD-15 | RBD     | 5.29 (1.44)                               | NA                                     | 0.273                                                  |
| S1-RBD-16 | RBD     | 79.2 (4.23)                               | –                                      | 1,612                                                  |
| S1-RBD-20 | RBD     | 12.4 (1.06)                               | NA                                     | NA                                                     |
| S1-RBD-21 | RBD     | 14.1                                      | –                                      | 115                                                    |
| S1-RBD-23 | RBD     | 7.31 (0.418)                              | NA                                     | 18.5                                                   |
| S1-RBD-24 | RBD     | 218                                       | 12.3                                   | –                                                      |
| S1-RBD-27 | RBD     | 65.8                                      | NA                                     | NA                                                     |
| S1-RBD-29 | RBD     | 9.53 (1.04)                               | NA                                     | –                                                      |
| S1-RBD-35 | RBD     | 12.3 (2.40)                               | NA                                     | 51.2                                                   |
| S1-RBD-37 | RBD     | 391                                       | –                                      | NA                                                     |
| S1-RBD-40 | RBD     | 25.6 (5.88)                               | –                                      | 500                                                    |
| S1-RBD-47 | RBD     | 127 (11.6)                                | –                                      | 112                                                    |
| S1-RBD-48 | RBD     | 54.5                                      | –                                      | NA                                                     |
| S2-3      | S2      | 2,234 (751)                               | 6,277                                  | –                                                      |

"–" - Not determined

NA - No activity
