# Supplementary material for: Nanobody Repertoires for Exposing Vulnerabilities of SARS-CoV-2
Source: bioRxiv or medRxiv preprint supplement (doi:10.1101/2021.04.08.438911), 2021-04-10

## Supplementary Figure 2

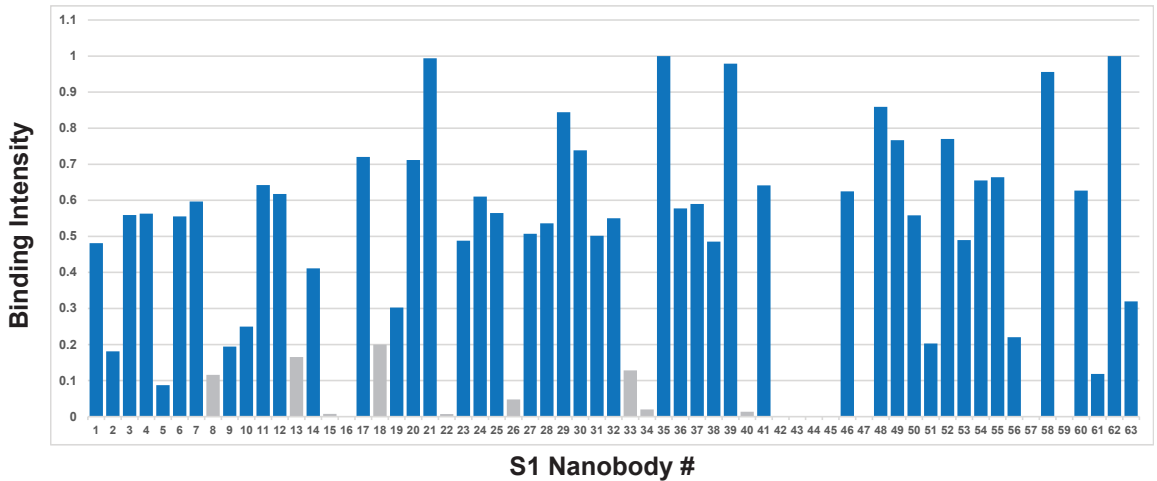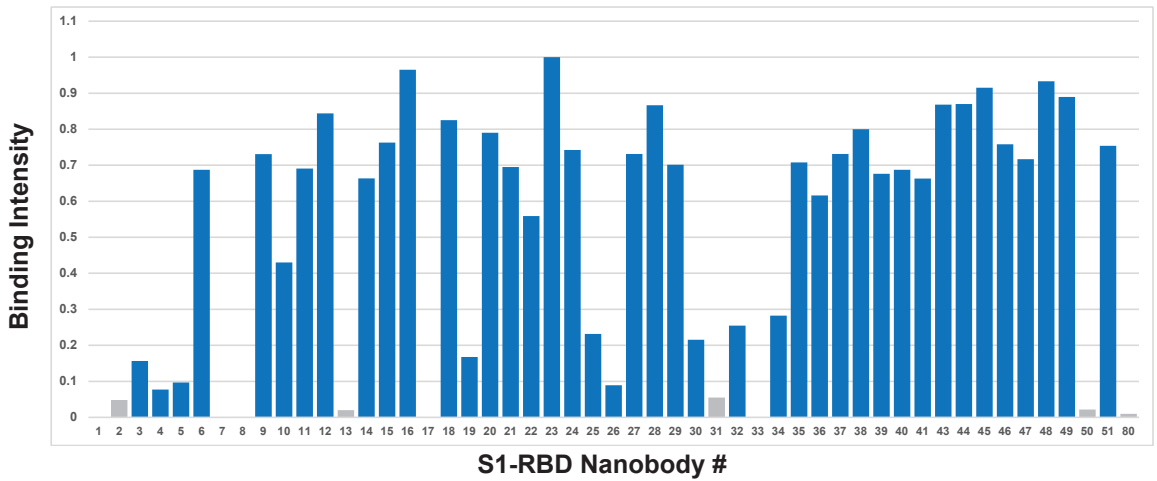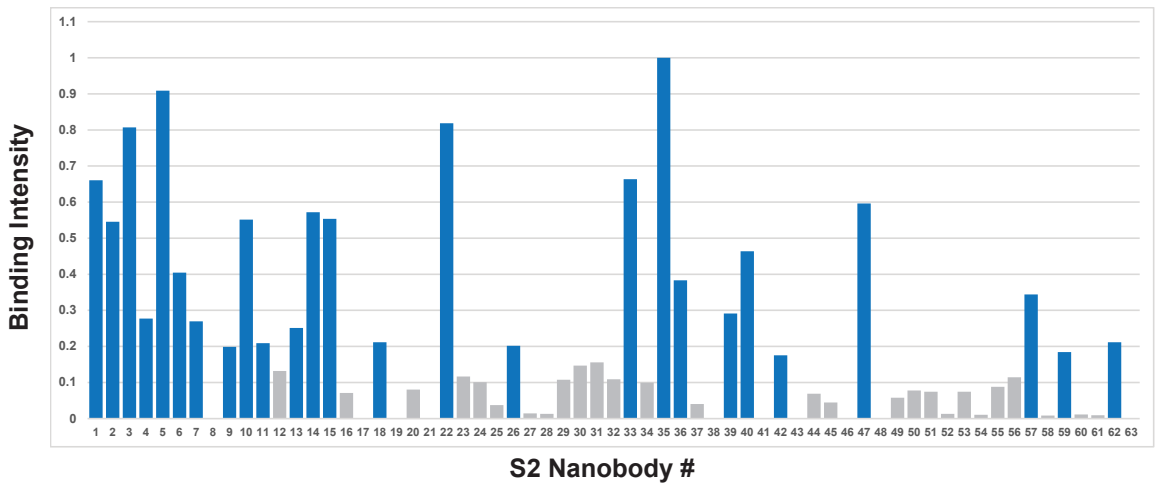

Supplement: Supplementary file [file media-2.pdf]
